# Supplementary material for: Degradation of tetrabromobisphenol A (TBBA) with calcium hydroxide: a thermo-kinetic analysis
Source: Royal Society of Chemistry journal article supplement (doi:10.1039/d2ra08223c), 2023-01-01
Supplement: d2ra08223c1.pdf [file d2ra08223c1.pdf]

Supplementary Materials (SM)  
for  
**Degradation of Tetrabromobisphenol A (TBBA) with Calcium  
Hydroxide: A Thermo-kinetic Analysis**

Labeeb Ali,<sup>1</sup> Kaushik Sivaramakrishnan,<sup>1</sup> Mohamed Shafi Kuttiyathil,<sup>1</sup> Vignesh  
Chandrasekaran,<sup>2</sup> Oday H. Ahmed,<sup>3</sup> Mohammad Al-Harabsheh,<sup>4</sup>  
Mohammednoor Altarawneh<sup>1\*</sup>

<sup>1</sup>United Arab Emirates University, Department of Chemical and Petroleum  
Engineering, Sheikh Khalifa bin Zayed Street, Al-Ain 15551, United Arab Emirates

<sup>2</sup>University of British Columbia, Department of Computer Science, Vancouver,  
Canada

<sup>3</sup>Department of Physics, College of Education, Al- Iraqia University, Baghdad, Iraq

<sup>4</sup>Chemical Engineering Department, Jordan University of Science and Technology,  
Irbid 22110, Jordan

\*Corresponding author's email: [mn.altarawneh@uaeu.ac.ae](mailto:mn.altarawneh@uaeu.ac.ae)

## Supplementary materials

**Table S1** Kinetic parameters of TBBA and TBBA:Ca(OH)<sub>2</sub> via KAS, FWO and Starink method in pyrolysis process

| <b>TBBA</b> |                  |               |                         |                  |               |                         |                      |               |                         |
|-------------|------------------|---------------|-------------------------|------------------|---------------|-------------------------|----------------------|---------------|-------------------------|
| $\alpha$    | <b>KAS Model</b> |               |                         | <b>FWO Model</b> |               |                         | <b>Starink model</b> |               |                         |
|             | $R^2$            | $E_a$         | $A$                     | $R^2$            | $E_a$         | $A$                     | $R^2$                | $E_a$         | $A$                     |
|             |                  | <b>kJ/mol</b> | <b>min<sup>-1</sup></b> |                  | <b>kJ/mol</b> | <b>min<sup>-1</sup></b> |                      | <b>kJ/mol</b> | <b>min<sup>-1</sup></b> |
| <b>0.05</b> | 0.99             | 124.06        | 1.61E+12                | 0.99             | 133.38        | 1.18E+13                | 0.99                 | 1241.44       | 1.74E+12                |
| <b>0.1</b>  | 0.99             | 120.14        | 6.94E+11                | 0.99             | 129.56        | 5.23E+12                | 0.99                 | 120.52        | 7.53E+11                |
| <b>0.15</b> | 0.99             | 117.72        | 4.13E+11                | 0.99             | 127.21        | 3.16E+12                | 0.99                 | 118.09        | 4.47E+11                |
| <b>0.2</b>  | 0.99             | 117.21        | 3.70E+11                | 0.99             | 126.76        | 2.87E+12                | 0.99                 | 117.59        | 4.02E+11                |
| <b>0.25</b> | 0.99             | 116.51        | 3.19E+11                | 0.99             | 126.09        | 2.49E+12                | 0.99                 | 116.89        | 3.46E+11                |
| <b>0.3</b>  | 0.99             | 116.42        | 3.13E+11                | 0.99             | 126.03        | 2.45E+12                | 0.99                 | 116.81        | 3.39E+11                |
| <b>0.35</b> | 0.99             | 116.01        | 2.86E+11                | 0.99             | 125.64        | 2.26E+12                | 0.99                 | 116.39        | 3.1E+11                 |
| <b>0.4</b>  | 0.99             | 115.46        | 2.54E+11                | 0.99             | 125.12        | 2.02E+12                | 0.99                 | 115.84        | 2.76E+11                |
| <b>0.45</b> | 0.99             | 115.37        | 2.5E+11                 | 0.99             | 125.05        | 1.99E+12                | 0.99                 | 115.76        | 2.71E+11                |
| <b>0.5</b>  | 0.99             | 115.56        | 2.6E+11                 | 0.99             | 125.27        | 2.08E+12                | 0.99                 | 115.95        | 2.82E+11                |
| <b>0.55</b> | 0.99             | 117.22        | 3.71E+11                | 0.99             | 126.95        | 2.99E+12                | 0.99                 | 117.61        | 4.03E+11                |
| <b>0.6</b>  | 0.99             | 113.29        | 1.61E+11                | 0.99             | 123.13        | 1.32E+12                | 0.99                 | 113.69        | 1.74E+11                |
| <b>0.65</b> | 0.87             | 77.61         | 6.98E+07                | 0.9              | 88.15         | 6.95E+08                | 0.87                 | 78.04         | 7.65E+07                |
| <b>0.7</b>  | 0.9              | 100.96        | 1.12E+10                | 0.92             | 112.81        | 1.44E+11                | 0.9                  | 101.43        | 1.24E+10                |
| <b>0.75</b> | 0.92             | 140.23        | 5.10E+13                | 0.92             | 153.18        | 8.04E+14                | 0.92                 | 140.75        | 5.70E+13                |
| <b>0.8</b>  | 0.21             | 62.76         | 2.63E+06                | 0.29             | 77.54         | 6.86E+06                | 0.20                 | 63.35         | 3.01E+06                |

**TBBA:Ca(OH)<sub>2</sub>**

| $\alpha$    | KAS Model |               |                         | FWO Model |               |                         | Starink model |               |                         |
|-------------|-----------|---------------|-------------------------|-----------|---------------|-------------------------|---------------|---------------|-------------------------|
|             | $R^2$     | $Ea$          | $A$                     | $R^2$     | $Ea$          | $A$                     | $R^2$         | $Ea$          | $A$                     |
|             |           | <b>kJ/mol</b> | <b>min<sup>-1</sup></b> |           | <b>kJ/mol</b> | <b>min<sup>-1</sup></b> |               | <b>kJ/mol</b> | <b>min<sup>-1</sup></b> |
| <b>0.05</b> | 0.95      | 85.68         | 2.56E+08                | 0.96      | 95.23         | 1.94E+09                | 0.95          | 86.07         | 2.77E+08                |
| <b>0.1</b>  | 0.97      | 84.85         | 2.14E+08                | 0.98      | 94.66         | 1.72E+09                | 0.97          | 85.24         | 2.33E+08                |
| <b>0.15</b> | 0.98      | 32.21         | 2.02E+03                | 0.98      | 42.62         | 2.18E+04                | 0.97          | 32.62         | 2.23E+03                |
| <b>0.2</b>  | 0.72      | 16.09         | 3.94E+01                | 0.89      | 29.18         | 9.99E+02                | 0.73          | 16.61         | 4.52E+01                |
| <b>0.25</b> | 0.92      | 60.63         | 1.16E+06                | 0.94      | 75.24         | 2.73E+07                | 0.92          | 61.21         | 1.32E+02                |
| <b>0.3</b>  | 0.91      | 91.73         | 9.24E+08                | 0.93      | 107.11        | 2.38E+10                | 0.91          | 92.34         | 1.05E+09                |

**Table S2** Kinetic parameters of TBBA and TBBA:Ca(OH)<sub>2</sub> via KAS, FWO, and Starink method in Combustion process

| <b>TBBA</b> |           |               |                         |           |               |                         |               |               |                         |
|-------------|-----------|---------------|-------------------------|-----------|---------------|-------------------------|---------------|---------------|-------------------------|
| $\alpha$    | KAS Model |               |                         | FWO Model |               |                         | Starink model |               |                         |
|             | $R^2$     | $Ea$          | $A$                     | $R^2$     | $Ea$          | $A$                     | $R^2$         | $Ea$          | $A$                     |
|             |           | <b>kJ/mol</b> | <b>min<sup>-1</sup></b> |           | <b>kJ/mol</b> | <b>min<sup>-1</sup></b> |               | <b>kJ/mol</b> | <b>min<sup>-1</sup></b> |
| <b>0.05</b> | 0.81      | 188.08        | 1.26E+18                | 0.82      | 197.39        | 9.04E+18                | 0.81          | 188.45        | 1.37E+18                |
| <b>0.1</b>  | 0.77      | 180.14        | 2.36E+17                | 0.78      | 189.62        | 1.74E+18                | 0.77          | 180.51        | 2.56E+17                |
| <b>0.15</b> | 0.76      | 169.46        | 2.46E+16                | 0.77      | 179.01        | 1.86E+17                | 0.76          | 169.85        | 2.67E+16                |
| <b>0.2</b>  | 0.76      | 163.06        | 6.34E+15                | 0.78      | 172.67        | 4.85E+16                | 0.76          | 163.45        | 6.88E+15                |
| <b>0.25</b> | 0.77      | 157.72        | 2.03E+15                | 0.79      | 167.34        | 1.57E+16                | 0.77          | 158.09        | 2.21E+15                |
| <b>0.3</b>  | 0.77      | 153.98        | 9.23E+14                | 0.79      | 163.65        | 7.19E+15                | 0.77          | 154.37        | 1E+15                   |
| <b>0.35</b> | 0.78      | 151.04        | 4.94E+14                | 0.8       | 160.74        | 3.88E+15                | 0.78          | 151.42        | 5.36E+14                |
| <b>0.4</b>  | 0.78      | 147.83        | 2.5E+14                 | 0.8       | 157.56        | 1.97E+15                | 0.78          | 148.22        | 2.71E+14                |
| <b>0.45</b> | 0.78      | 146.12        | 1.73E+14                | 0.8       | 155.87        | 1.38E+15                | 0.78          | 146.51        | 1.88E+14                |
| <b>0.5</b>  | 0.78      | 144.16        | 1.14E+14                | 0.8       | 153.93        | 9.13E+14                | 0.78          | 144.55        | 1.24E+14                |
| <b>0.55</b> | 0.78      | 142.42        | 7.88E+13                | 0.8       | 152.23        | 6.36E+14                | 0.78          | 142.81        | 8.57E+13                |

|             |      |        |          |      |        |          |      |        |          |
|-------------|------|--------|----------|------|--------|----------|------|--------|----------|
| <b>0.6</b>  | 0.83 | 127.73 | 3.43E+12 | 0.85 | 137.71 | 2.89E+13 | 0.83 | 128.13 | 3.74E+12 |
| <b>0.65</b> | 0.87 | 125.17 | 1.98E+12 | 0.89 | 136.06 | 2.03E+13 | 0.87 | 125.59 | 2.18E+12 |
| <b>0.7</b>  | 0.86 | 119.18 | 5.5E+11  | 0.89 | 130.82 | 6.62E+12 | 0.87 | 119.65 | 6.08E+11 |
| <b>0.75</b> | 0.83 | 105.17 | 2.71E+10 | 0.87 | 117.34 | 3.71E+11 | 0.84 | 105.65 | 3.01E+10 |
| <b>0.8</b>  | 0.82 | 98.59  | 6.56E+09 | 0.86 | 111.17 | 9.87E+10 | 0.82 | 99.11  | 7.32E+09 |
| <b>0.85</b> | 0.82 | 99.42  | 7.84E+09 | 0.86 | 112.28 | 1.25E+11 | 0.83 | 99.93  | 8.74E+09 |
| <b>0.9</b>  | 0.83 | 101.69 | 1.28E+10 | 0.86 | 114.81 | 2.15E+11 | 0.83 | 102.21 | 1.43E+10 |
| <b>0.95</b> | 0.82 | 99.99  | 8.87E+09 | 0.86 | 113.41 | 1.6E+11  | 0.82 | 100.53 | 9.97E+09 |

**TBBA:Ca(OH)<sub>2</sub>**

| $\alpha$    | KAS Model |               |                         | FWO Model |               |                         | Starink model |               |                         |
|-------------|-----------|---------------|-------------------------|-----------|---------------|-------------------------|---------------|---------------|-------------------------|
|             | $R^2$     | $Ea$          | $A$                     | $R^2$     | $Ea$          | $A$                     | $R^2$         | $Ea$          | $A$                     |
|             |           | <b>kJ/mol</b> | <b>min<sup>-1</sup></b> |           | <b>kJ/mol</b> | <b>min<sup>-1</sup></b> |               | <b>kJ/mol</b> | <b>min<sup>-1</sup></b> |
| <b>0.05</b> | 0.98      | 88.89         | 5.02E+08                | 0.99      | 98.45         | 3.80E+09                | 0.98          | 89.28         | 5.45E+08                |
| <b>0.1</b>  | 0.98      | 97.39         | 3.04E+09                | 0.98      | 107.21        | 2.41E+10                | 0.98          | 97.79         | 3.30E+09                |
| <b>0.15</b> | 0.97      | 57.59         | 5.98E+05                | 0.98      | 67.79         | 5.49E+06                | 0.97          | 58.01         | 6.54E+05                |
| <b>0.2</b>  | 0.3       | 9.01          | 5.30E+6                 | 0.72      | 21.46         | 1.55E+02                | 0.32          | 9.50          | 6.18E+06                |
| <b>0.25</b> | 0.8       | 13.58         | 2.01E+01                | 0.92      | 26.80         | 5.68E+02                | 0.8           | 14.35         | 2.4E+01                 |
| <b>0.3</b>  | 0.99      | 55.27         | 3.59E+05                | 0.99      | 69.92         | 8.69E+06                | 0.99          | 55.86         | 4.09E+05                |
| <b>0.35</b> | 0.99      | 65.87         | 3.61E+06                | 0.99      | 80.94         | 9.23E+07                | 0.99          | 66.47         | 4.12E+06                |
| <b>0.4</b>  | 0.99      | 73.52         | 1.87E+07                | 0.99      | 88.89         | 5.02E+08                | 0.99          | 74.12         | 2.13E+07                |
| <b>0.45</b> | 0.99      | 76.98         | 3.95E+07                | 0.99      | 92.64         | 1.11E+09                | 0.99          | 77.61         | 4.52E+07                |
| <b>0.5</b>  | 0.99      | 75.43         | 2.83E+07                | 0.99      | 91.36         | 8.48E+08                | 0.99          | 76.07         | 3.25E+07                |
| <b>0.55</b> | 0.99      | 71.66         | 1.26E+07                | 0.99      | 87.87         | 4.04E+08                | 0.99          | 72.31         | 1.45E+07                |
| <b>0.6</b>  | 0.99      | 68.38         | 6.22E+06                | 0.99      | 84.87         | 2.14E+08                | 0.99          | 69.04         | 7.18 E+06               |

**Table S3** Thermodynamics parameters of TBBA and TBBA:Ca(OH)<sub>2</sub> via KAS, FWO, and Starink method in pyrolysis process

| TBBA                     |            |            |            |            |            |            |               |            |            |
|--------------------------|------------|------------|------------|------------|------------|------------|---------------|------------|------------|
| KAS Model                |            |            | FWO Model  |            |            |            | Starink model |            |            |
| $\alpha$                 | $\Delta H$ | $\Delta G$ | $\Delta S$ | $\Delta H$ | $\Delta G$ | $\Delta S$ | $\Delta H$    | $\Delta G$ | $\Delta S$ |
|                          | kJ/mol        | kJ/mol     | kJ/mol     |
| <b>0.05</b>              | 119.3005   | 133.8686   | -0.02497   | 128.6205   | 133.5173   | -0.00839   | 119.6746      | 133.854    | -0.02431   |
| <b>0.1</b>               | 115.3763   | 134.0245   | -0.03197   | 124.8044   | 133.6581   | -0.01518   | 115.7587      | 134.0091   | -0.03128   |
| <b>0.15</b>              | 112.9569   | 134.1232   | -0.03628   | 122.4515   | 133.747    | -0.01936   | 113.331       | 134.1078   | -0.03562   |
| <b>0.2</b>               | 112.4498   | 134.1441   | -0.03719   | 121.9942   | 133.7644   | -0.02018   | 112.8322      | 134.1283   | -0.03651   |
| <b>0.25</b>              | 111.7514   | 134.1731   | -0.03844   | 121.3374   | 133.7896   | -0.02135   | 112.1338      | 134.1572   | -0.03775   |
| <b>0.3</b>               | 111.6599   | 134.1769   | -0.0386    | 121.2709   | 133.7922   | -0.02146   | 112.0424      | 134.161    | -0.03792   |
| <b>0.35</b>              | 111.2442   | 134.1942   | -0.03934   | 120.8802   | 133.8072   | -0.02216   | 111.6267      | 134.1783   | -0.03866   |
| <b>0.4</b>               | 110.6955   | 134.2172   | -0.04032   | 120.3564   | 133.8275   | -0.02309   | 111.0779      | 134.2012   | -0.03964   |
| <b>0.45</b>              | 110.6124   | 134.2207   | -0.04047   | 120.2899   | 133.8301   | -0.02321   | 110.9948      | 134.2047   | -0.03979   |
| <b>0.5</b>               | 110.8036   | 134.2127   | -0.04013   | 120.506    | 133.8217   | -0.02283   | 111.186       | 134.1967   | -0.03944   |
| <b>0.55</b>              | 112.4581   | 134.1438   | -0.03717   | 122.1938   | 133.7568   | -0.01982   | 112.8488      | 134.1276   | -0.03648   |
| <b>0.6</b>               | 108.5339   | 134.3089   | -0.04418   | 118.3693   | 133.9051   | -0.02663   | 108.9329      | 134.2919   | -0.04347   |
| <b>0.65</b>              | 72.85267   | 136.1434   | -0.10849   | 83.38402   | 135.5263   | -0.08938   | 73.27419      | 136.1172   | -0.10773   |
| <b>0.7</b>               | 96.19589   | 134.8681   | -0.06629   | 108.0433   | 134.3299   | -0.04506   | 96.66979      | 134.8454   | -0.06544   |
| <b>0.75</b>              | 135.4712   | 133.2744   | 0.003766   | 148.4161   | 132.8461   | 0.02669    | 135.9867      | 133.2566   | 0.00468    |
| <b>0.8</b>               | 57.99805   | 137.1738   | -0.13572   | 72.77868   | 136.1481   | -0.10863   | 58.58917      | 137.1283   | -0.13463   |
| TBBA:Ca(OH) <sub>2</sub> |            |            |            |            |            |            |               |            |            |
| KAS Model                |            |            | FWO Model  |            |            |            | Starink model |            |            |
| $\alpha$                 | $\Delta H$ | $\Delta G$ | $\Delta S$ | $\Delta H$ | $\Delta G$ | $\Delta S$ | $\Delta H$    | $\Delta G$ | $\Delta S$ |
|                          | kJ/mol        | kJ/mol     | kJ/mol     |
| <b>0.05</b>              | 79.59283   | 139.3033   | -0.09994   | 89.1373    | 138.7786   | -0.08308   | 79.97528      | 139.2811   | -0.09926   |
| <b>0.1</b>               | 78.76143   | 139.3517   | -0.10141   | 88.57195   | 138.8082   | -0.08408   | 79.15219      | 139.3289   | -0.10072   |

|             |          |          |          |          |          |          |          |          |          |
|-------------|----------|----------|----------|----------|----------|----------|----------|----------|----------|
| <b>0.15</b> | 26.1097  | 144.1648 | -0.19759 | 36.52964 | 142.7721 | -0.17782 | 26.52706 | 144.1008 | -0.19678 |
| <b>0.2</b>  | 9.996338 | 147.6119 | -0.23033 | 23.09255 | 144.6535 | -0.20346 | 10.52012 | 147.4528 | -0.22918 |
| <b>0.25</b> | 54.53527 | 141.0217 | -0.14475 | 69.14463 | 139.9492 | -0.11851 | 55.11642 | 140.9743 | -0.1437  |
| <b>0.3</b>  | 85.63711 | 138.9646 | -0.08925 | 101.0097 | 138.195  | -0.06224 | 86.25235 | 138.9314 | -0.08817 |

**Table S4** Thermodynamics parameters of TBBA and TBBA:Ca(OH)<sub>2</sub> via KAS, FWO, and Starink method in combustion process

| TBBA        |            |            |            |            |            |            |               |            |            |
|-------------|------------|------------|------------|------------|------------|------------|---------------|------------|------------|
| $\alpha$    | KAS Model  |            |            | FWO Model  |            |            | Starink model |            |            |
|             | $\Delta H$ | $\Delta G$ | $\Delta S$ | $\Delta H$ | $\Delta G$ | $\Delta S$ | $\Delta H$    | $\Delta G$ | $\Delta S$ |
|             | kJ/mol        | kJ/mol     | kJ/mol     |
| <b>0.05</b> | 182.3248   | 131.9973   | 0.086185   | 191.6365   | 131.7627   | 0.102533   | 182.6989      | 131.9876   | 0.086842   |
| <b>0.1</b>  | 174.3849   | 132.2067   | 0.072229   | 183.8462   | 131.9582   | 0.088857   | 174.759       | 132.1966   | 0.072887   |
| <b>0.15</b> | 163.7097   | 132.5033   | 0.05344    | 173.2542   | 132.2373   | 0.070241   | 164.0922      | 132.4923   | 0.054114   |
| <b>0.2</b>  | 157.3079   | 132.6902   | 0.042157   | 166.9106   | 132.4124   | 0.059078   | 157.6904      | 132.6789   | 0.042832   |
| <b>0.25</b> | 151.9454   | 132.8526   | 0.032696   | 161.5897   | 132.5644   | 0.049705   | 152.3362      | 132.8406   | 0.033386   |
| <b>0.3</b>  | 148.2291   | 132.9684   | 0.026134   | 157.8982   | 132.6727   | 0.043198   | 148.6115      | 132.9563   | 0.026809   |
| <b>0.35</b> | 145.2859   | 133.0621   | 0.020933   | 154.9883   | 132.7598   | 0.038066   | 145.6683      | 133.0498   | 0.021609   |
| <b>0.4</b>  | 142.0767   | 133.1663   | 0.015259   | 151.8041   | 132.8569   | 0.032447   | 142.4675      | 133.1535   | 0.01595    |
| <b>0.45</b> | 140.364    | 133.2229   | 0.012229   | 150.1163   | 132.9092   | 0.029467   | 140.7548      | 133.2099   | 0.01292    |
| <b>0.5</b>  | 138.4102   | 133.2883   | 0.008771   | 148.1792   | 132.9699   | 0.026046   | 138.801       | 133.2751   | 0.009463   |
| <b>0.55</b> | 136.6643   | 133.3474   | 0.00568    | 146.4748   | 133.024    | 0.023034   | 137.055       | 133.3341   | 0.006372   |
| <b>0.6</b>  | 121.9734   | 133.876    | -0.02038   | 131.9586   | 133.5105   | -0.00266   | 122.3725      | 133.8608   | -0.01967   |
| <b>0.65</b> | 119.4127   | 133.9743   | -0.02494   | 130.3041   | 133.5692   | -0.00559   | 119.8451      | 133.9575   | -0.02417   |
| <b>0.7</b>  | 113.4267   | 134.2122   | -0.03559   | 125.0496   | 133.7604   | -0.01492   | 113.8922      | 134.1933   | -0.03477   |
| <b>0.75</b> | 99.40925   | 134.8197   | -0.06064   | 111.5893   | 134.2876   | -0.03887   | 99.89978      | 134.7971   | -0.05976   |
| <b>0.8</b>  | 92.84119   | 135.1328   | -0.07242   | 105.4203   | 134.5498   | -0.04988   | 93.34834      | 135.1079   | -0.07151   |

|             |          |          |          |          |          |          |          |          |          |
|-------------|----------|----------|----------|----------|----------|----------|----------|----------|----------|
| <b>0.85</b> | 93.66428 | 135.0924 | -0.07094 | 106.526  | 134.5018 | -0.04791 | 94.17143 | 135.0677 | -0.07003 |
| <b>0.9</b>  | 95.934   | 134.9828 | -0.06687 | 109.0535 | 134.3937 | -0.04339 | 96.45778 | 134.9579 | -0.06593 |
| <b>0.95</b> | 94.23794 | 135.0645 | -0.06991 | 107.6567 | 134.4531 | -0.04589 | 94.77835 | 135.0383 | -0.06894 |

**TBBA:Ca(OH)<sub>2</sub>**

| $\alpha$    | KAS Model  |            |            | FWO Model  |            |            | Starink model |            |            |
|-------------|------------|------------|------------|------------|------------|------------|---------------|------------|------------|
|             | $\Delta H$ | $\Delta G$ | $\Delta S$ | $\Delta H$ | $\Delta G$ | $\Delta S$ | $\Delta H$    | $\Delta G$ | $\Delta S$ |
|             | kJ/mol        | kJ/mol     | kJ/mol     |
| <b>0.05</b> | 82.36555   | 139.177    | -0.09505   | 91.91834   | 138.6698   | -0.07822   | 82.74799      | 139.1557   | -0.09437   |
| <b>0.1</b>  | 90.86246   | 138.7234   | -0.08008   | 100.673    | 138.2464   | -0.06286   | 91.25322      | 138.7035   | -0.07939   |
| <b>0.15</b> | 51.06667   | 141.3337   | -0.15102   | 61.2721    | 140.5231   | -0.13259   | 51.47488      | 141.2986   | -0.15028   |
| <b>0.2</b>  | 2.475494   | 150.5559   | -0.24775   | 14.93485   | 146.239    | -0.21968   | 2.973502      | 150.2884   | -0.24647   |
| <b>0.25</b> | 7.056508   | 148.5119   | -0.23667   | 20.28159   | 145.1336   | -0.20889   | 7.824721      | 148.2386   | -0.23492   |
| <b>0.3</b>  | 48.7429    | 141.5384   | -0.15525   | 63.40049   | 140.3695   | -0.12878   | 49.32987      | 141.4859   | -0.15418   |
| <b>0.35</b> | 59.34076   | 140.6667   | -0.13606   | 74.41404   | 139.6427   | -0.10913   | 59.94352      | 140.6214   | -0.13498   |
| <b>0.4</b>  | 66.97301   | 140.1219   | -0.12238   | 82.36555   | 139.177    | -0.09505   | 67.58825      | 140.0804   | -0.12129   |
| <b>0.45</b> | 70.45242   | 139.892    | -0.11618   | 86.11516   | 138.9717   | -0.08843   | 71.0793       | 139.8517   | -0.11506   |
| <b>0.5</b>  | 68.90352   | 139.993    | -0.11894   | 84.83481   | 139.0409   | -0.09069   | 69.54037      | 139.9513   | -0.1178    |
| <b>0.55</b> | 65.13395   | 140.2478   | -0.12567   | 81.34293   | 139.2345   | -0.09686   | 65.78245      | 140.203    | -0.12451   |
| <b>0.6</b>  | 61.85574   | 140.4805   | -0.13155   | 78.34989   | 139.4067   | -0.10215   | 62.51588      | 140.4327   | -0.13036   |

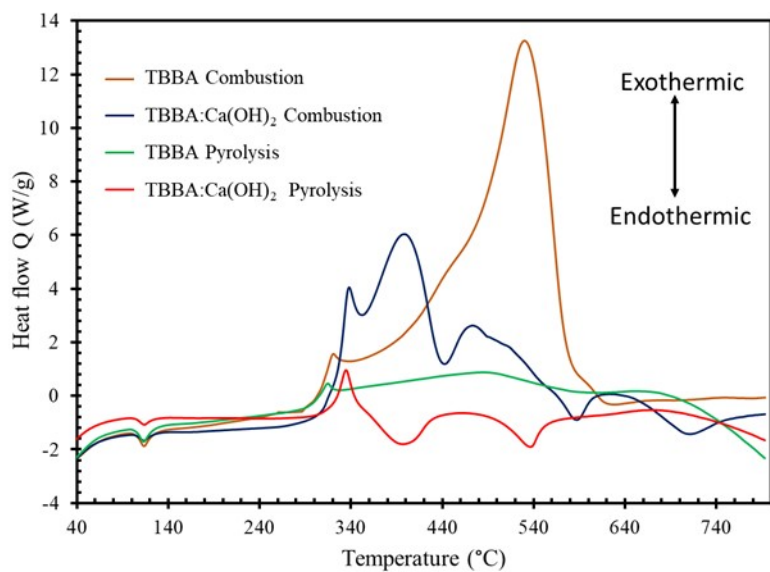

**Fig. S1** DSC curve for the four samples during pyrolysis and combustion

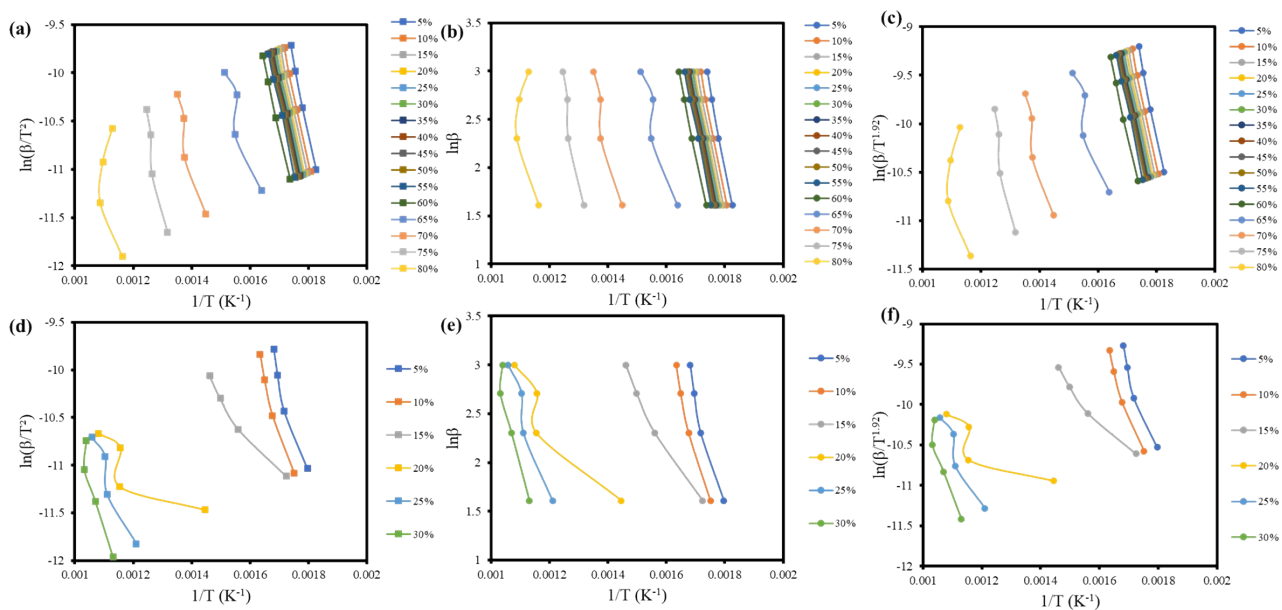

**Fig. S2** Isoconversional curves for pyrolysis of TBBA (a) KAS, (b) FWO and (c) Starink, and for pyrolysis of TBBA:Ca(OH)<sub>2</sub> (d) KAS, (e) FWO and (f) Starink models



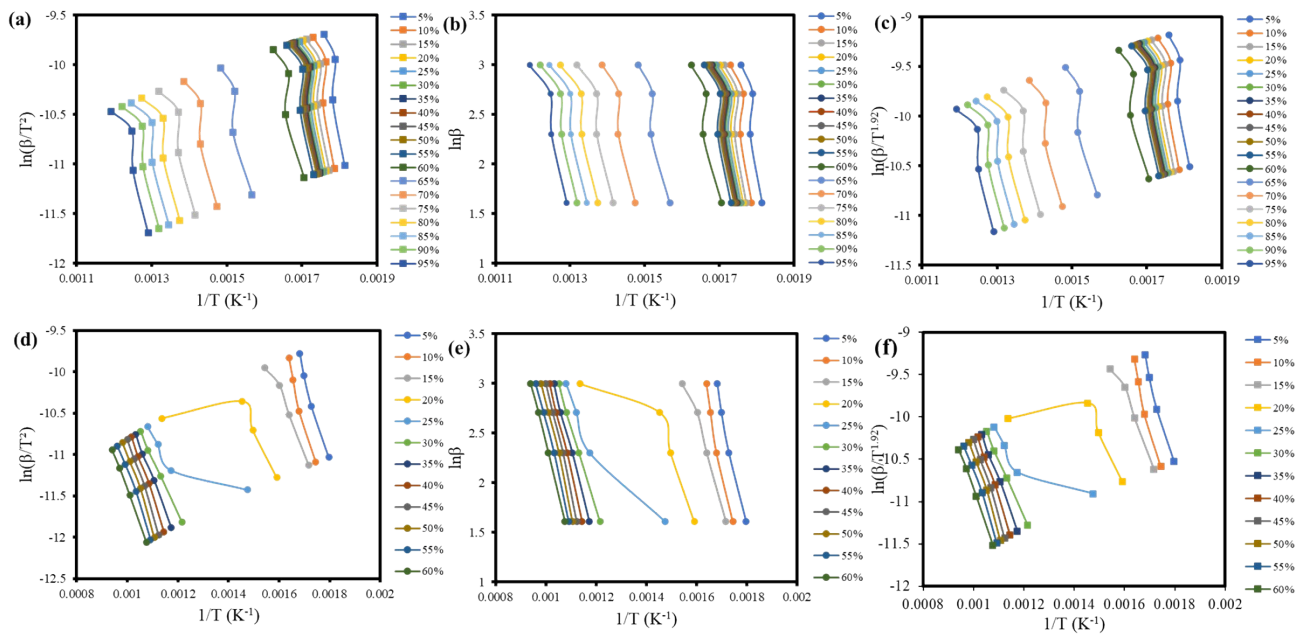

**Fig. S3** Isoconversional curves for combustion of TBBA (a) KAS, (b) FWO and (c) Starink, and for combustion of TBBA:Ca(OH)<sub>2</sub> (d) KAS, (e) FWO and (f) Starink models
